# Supplementary material
Source: PubMed Central journal article supplement (PMC528739)

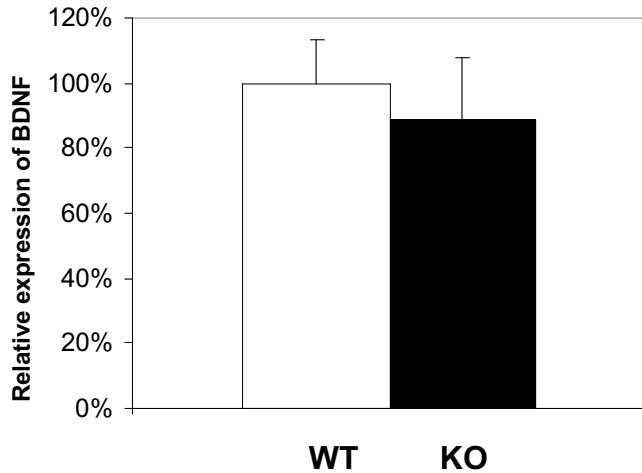

Supplement: pnas_101_45_16064__1.pdf [file pnas_101_45_16064__1.pdf]

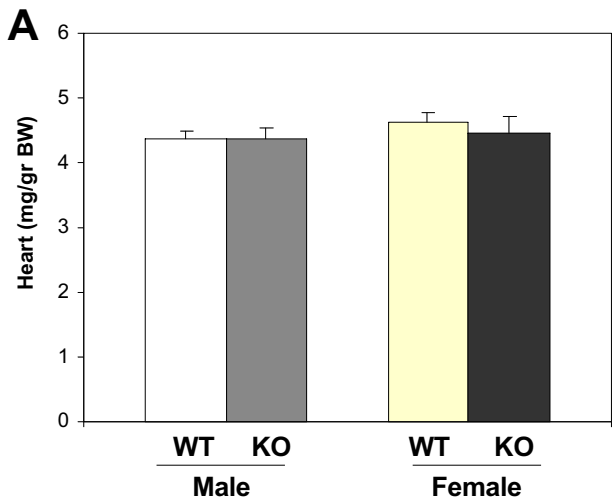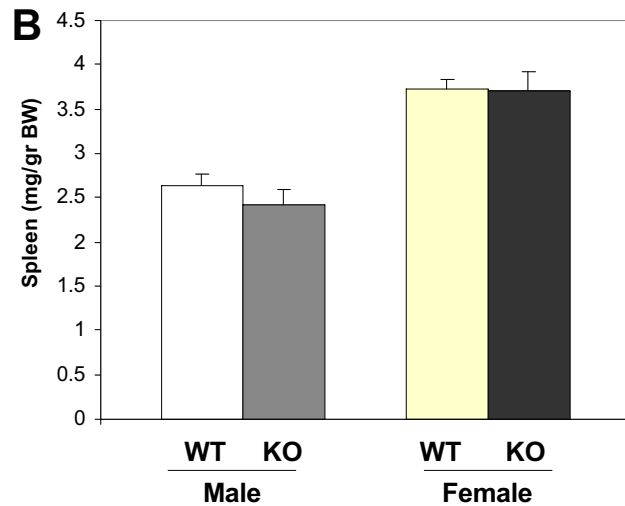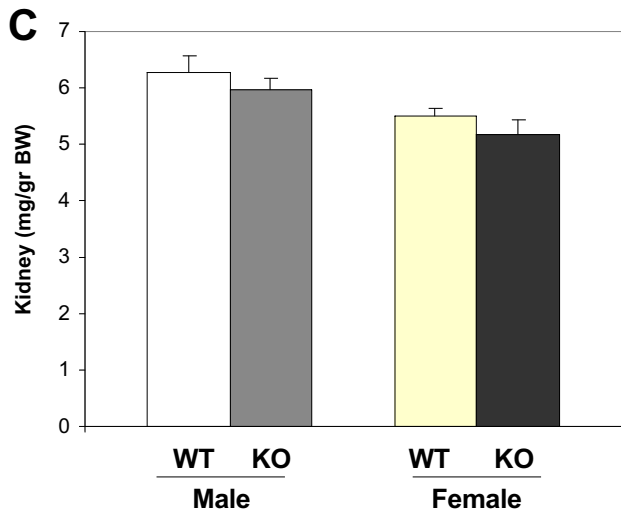

Supplement: pnas_101_45_16064__2.pdf [file pnas_101_45_16064__2.pdf]
